# Supplementary material
Source: PubMed Central journal article supplement (PMC3494079)
Supplement: emmm0004-0825-SD2.pdf [file emmm0004-0825-SD2.pdf]

## **Supplementary Information**

**Title:** A transcriptional network underlies susceptibility to kidney disease progression

**Authors:** Denise Laouari, Martine Burtin, Aurélie Phelep, Frank Bienaime, Laure-Hélène Noel, David C. Lee, Christophe Legendre, Gérard Friedlander, Marco Pontoglio, Fabiola Terzi.

**Content:** Supplementary Table 1

Supplementary Table 2

Supplementary Table 3

**Supplementary Table 1:** Transcription factors located in the *Ckdp1* confidence interval. Their potential binding activity to TGF- $\alpha$  promoter is indicated.

| Gene ID        | Potential binding to TGF- $\alpha$ |
|----------------|------------------------------------|
| Atho8          | Not                                |
| Tcf3           | Yes                                |
| AW146020       | Not                                |
| Tlx2           | Not                                |
| Lbx2           | Not                                |
| Ankrd53        | Not                                |
| Emx1           | Not                                |
| Noto           | Not                                |
| Egr4           | Not                                |
| NP_001032931.1 | Not                                |
| Cml3           | Not                                |
| Figla          | Not                                |
| Mxd1           | Not                                |
| Gmcl1          | Not                                |
| Cnbp           | Not                                |
| Gata2          | Not                                |
| Abtb1          | Not                                |
| Klf15          | Not                                |
| Nr2c2          | Not                                |
| Mitf           | Yes                                |
| Foxp1          | Not                                |
| Rybp           | Not                                |
| Bhlhb2         | Yes                                |

**Supplementary Table 2:** Fine mapping of the *Ckdp1* locus in G2 progeny.

| Markers           | Position |       | Discordance<br>% | Fisher's test<br>P-value |
|-------------------|----------|-------|------------------|--------------------------|
|                   | cM       | Mbp   |                  |                          |
| <i>D6Mit138</i>   | 0.7      | 4.5   | 41.7             | 0.5391                   |
| <i>rs13478669</i> | 15.0     | 26.0  | 34.0             | 0.1410                   |
| <i>D6Mit123</i>   | 29.0     | 56.9  | 30.6             | 0.0637                   |
| <i>D6Mit209</i>   | 32.5     | 75.5  | 20.4             | 0.0029                   |
| <i>D6Mit100</i>   | 37.0     | 92.0  | 24.5             | 0.0119                   |
| <i>rs30663147</i> | 40.0     | 97.8  | 19.1             | 0.0022                   |
| <i>rs31000275</i> | 45.0     | 105.6 | 22.7             | 0.0142                   |
| <i>D6Mit328</i>   | 49.3     | 112.7 | 26.5             | 0.0220                   |
| <i>rs29871587</i> | 60.0     | 129.0 | 29.8             | 0.0597                   |
| <i>D6Mit373</i>   | 74.3     | 147.0 | 38.8             | 0.3100                   |

Discordance indicates the percentage of animals for which the observed phenotype did not fit with the expected one. In red, the peak of the linkage. Of note, the *rs30663147* marker corresponds to the G/A polymorphism.

**Supplementary Table 3:** List of the primers used in the different experiments

|                                                                   | Forward                                 | Reverse                                       | PCR product size (bp) |
|-------------------------------------------------------------------|-----------------------------------------|-----------------------------------------------|-----------------------|
| <b>Mouse MITF-A 5'UTR</b>                                         |                                         |                                               |                       |
|                                                                   | S1: 5'-CCCAGGCGGAACCACAA-3'             | R1: 5'-GGTGGTGGGCACGCTGAC-3'                  | 490                   |
|                                                                   | S2: 5'-CCTCCCGCTCTGGTGTGAGA-3'          | R2: 5'-TGTCTGACTCACGGCCACTC-3'                | 502                   |
|                                                                   |                                         | R3: 5'-TCCCTCTTGCCCGCCTTC-3'                  |                       |
| <b>Mouse TGF-<math>\alpha</math> promoter luciferase reporter</b> |                                         |                                               |                       |
|                                                                   | 5'-CTAGCAGACCAGCCCGATCAGT-3'            | 5'-ACCCGCCTCTCTTCTGTTCTCC-3'                  | 3330                  |
| <b>Mouse MITF-A construct (B6D2F1 or FVB/N)</b>                   |                                         |                                               |                       |
| cDNA                                                              | 5'-TCTCAGGTGCCCCGGGTTC-3'               | 5'-CTGAAGAGAGGGAGCGGTC-3'                     | 1669                  |
| Genomic DNA                                                       | 5'-CCCAGGCGGAACCACAAA-3'                | 5'-AGTCGTCTGTAAGCGGGACCCTA-                   | 470                   |
| <b>cDNA MITF-A construct for antibody production</b>              |                                         |                                               |                       |
|                                                                   | 5'-TCCCCCGGGTGGAGCCATGCAGTC<br>CGAAT-3' | 5'-<br>AGTTTAGCGGCCGCTTGCTCTTC<br>AGCGGTTC-3' | 104                   |
| <b>Real-time RT-PCR</b>                                           |                                         |                                               |                       |
| Human TGF- $\alpha$                                               | 5'-GAGCCCAGAGGAGGAGTTTG-3'              | 5'-CGTGGTCCGCTGATTTCTT-3'                     | 218                   |
| Mouse TGF- $\alpha$                                               | 5'-GCCCAGATTCCCACACTCAG-3'              | 5'-CACGGCACCCTCACAGTG-3'                      | 124                   |
| Mouse MITF-A                                                      | 5'-GGAGCCATGCAGTCCGAA-3'                | 5'-AGCGGTTGACTTTTGAGTTCG-3'                   | 92                    |
| Mouse GAPDH                                                       | 5'-TGCACCACCAACTGCTTAG-3'               | 5'-GGATGCAGGGATGATGTTC-3'                     | 177                   |
| $\beta$ -gal                                                      | 5'-GCGGCGAGTTGCGTGACTAC-3'              | 5'-GCGCTCCACAGTTTCGGGTT-3'                    | 340                   |
| <b>DNA binding assay</b>                                          |                                         |                                               |                       |
| E-box                                                             | 5'-CTGCTCTGCACGTGTTCCAGTC-3'            |                                               |                       |
| HNF1                                                              | 5'-AGTTACTTATTGACT-3'                   |                                               |                       |
| NF $\kappa$ B                                                     | 5'-TATGTCTGGGGAATTCCAGCTCC-3'           |                                               |                       |
| <b>Chromatin immunoprecipitation assay</b>                        |                                         |                                               |                       |
| Mouse TGF- $\alpha$                                               | 5'-TCTCTACAGCCCCACAAATTAT-3'            | 5'-CATCCCTTCCTACACTGACTA-3'                   | 394                   |
| Mouse $\alpha$ -SMA-2                                             | 5'-AGGAAAATCAGATCCCCTGGA-3'             | 5'-AGGTGGCTCACTACCACCTGTAA-                   | 52                    |
